# Supplementary material for: Mesoporous nitrogen-rich carbons derived from protein for ultra-high capacity battery anodes and supercapacitors
Source: Royal Society of Chemistry journal article supplement (doi:10.1039/c2ee23599d), 2013-01-01
Supplement: c2ee23599d.pdf [file c2ee23599d.pdf]

## Supporting Information

### Mesoporous nitrogen-rich carbons derived from protein for ultra-high capacity battery anodes and supercapacitors

Zhi Li, Zhanwei Xu, Xuehai Tan, Huanlei Wang,\* Chris M. B. Holt, Tyler Stephenson, Brian C. Olsen and David Mitlin \*

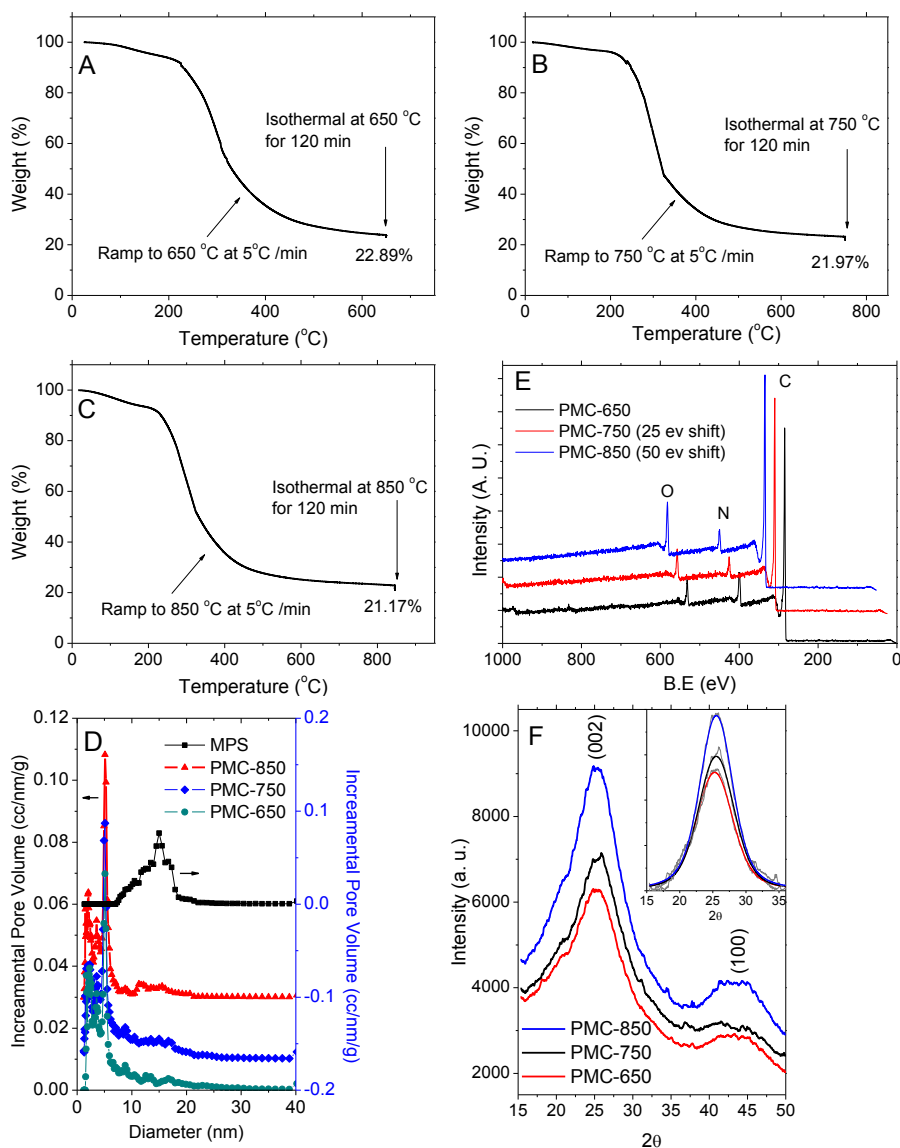

**Figure S1** Thermogravimetric Analysis curves of dry egg white, performed using the same heating profile as the pyrolysis process for the PMC samples (A-C); DFT pore-size distribution (D), XPS survey spectra (E) and XRD patterns (F) of PMC carbons. The inset in (F) shows the (002) diffraction peak that was fit with a Voigt function to obtain the FWHM for each PMC specimen.

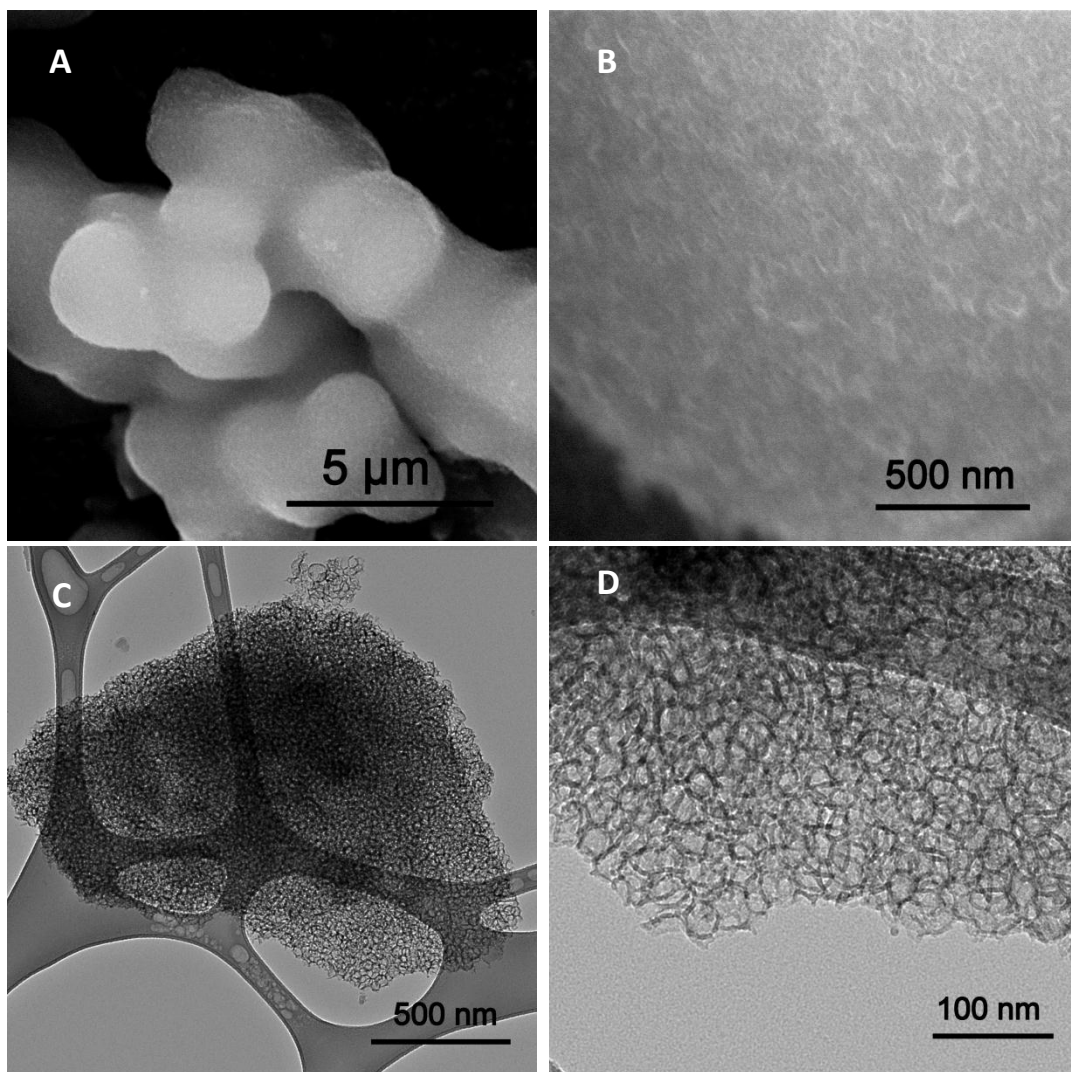

**Fig. S2** SEM images (A, B) and TEM images (C, D) of the mesoporous cellular foam silica template used in this work.

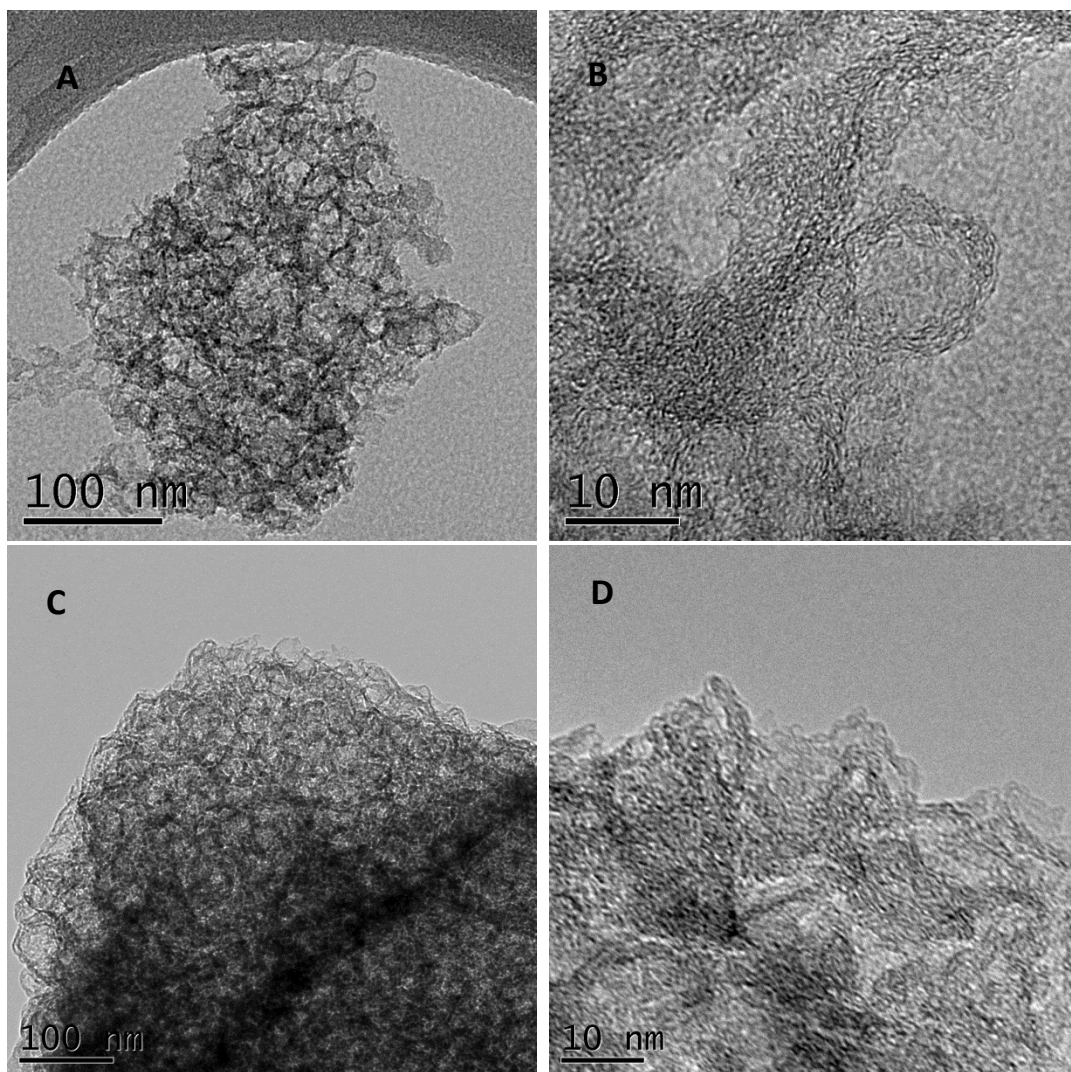

**Fig. S3** TEM images of PMC-750 (A, B) and PMC-650 (C, D).

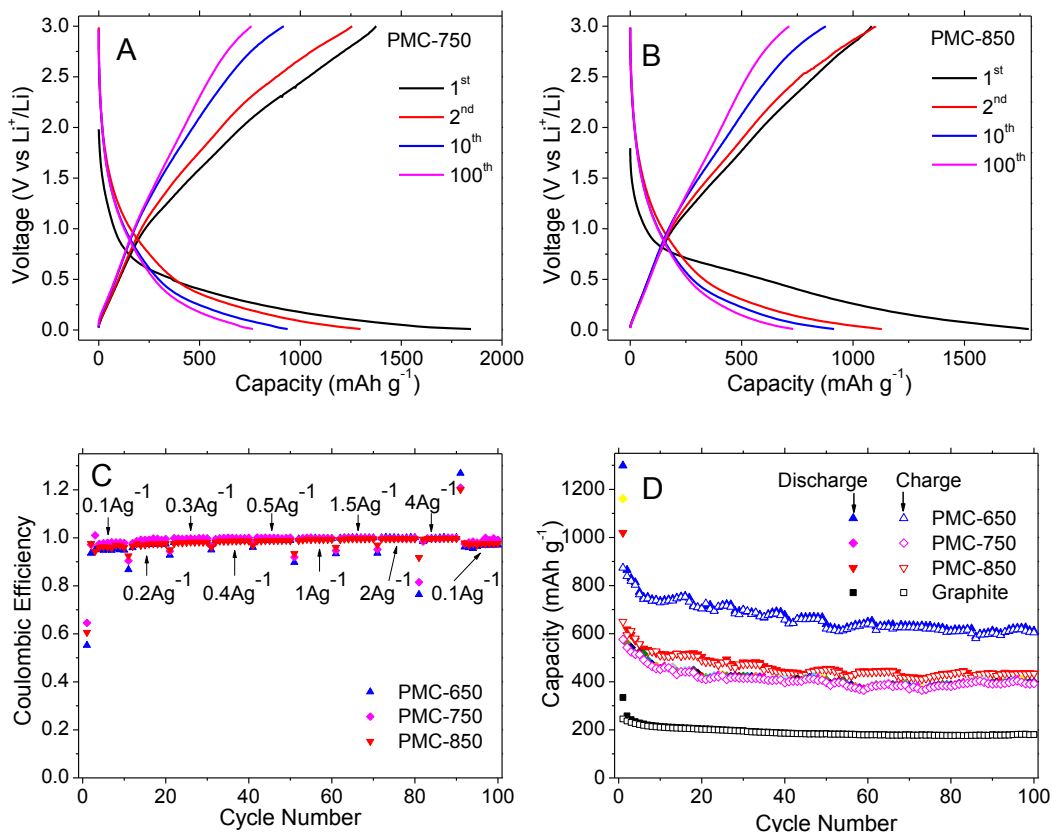

**Fig. S4** Electrochemical performance of PMC carbons in a LIB half-cell configuration vs. Li metal. Charge/discharge curves of PMC-750 (A) and PMC-850 (B); Coulombic efficiency various rate (C); Charge/discharge capacity versus cycle number at 0.5 A g<sup>-1</sup> (D).

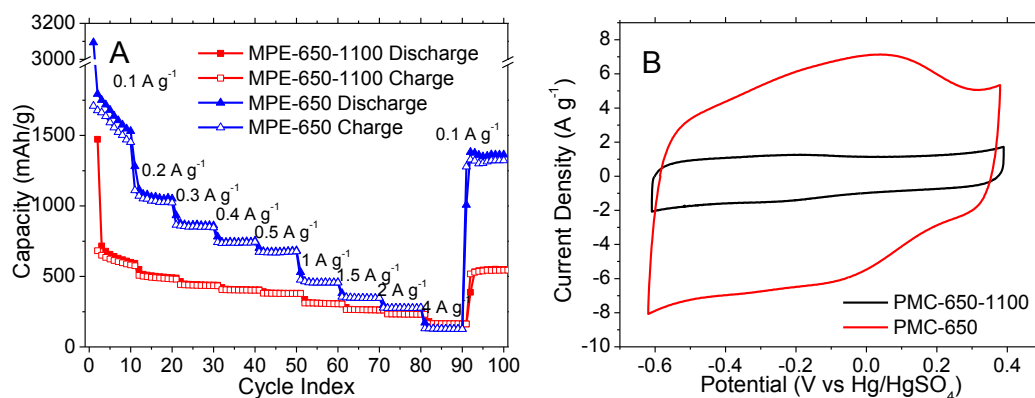

**Fig. S5** Electrochemical performance of PMC-650 before and after eliminating the surface functionalities by heating to 1100°C in argon (PMC-650-1100). Charge/discharge capacity versus cycle number for carbons in a LIB half-cell configuration vs. Li metal (A); Cyclic voltammograms at 20 mV/S in 1M H<sub>2</sub>SO<sub>4</sub> (B).

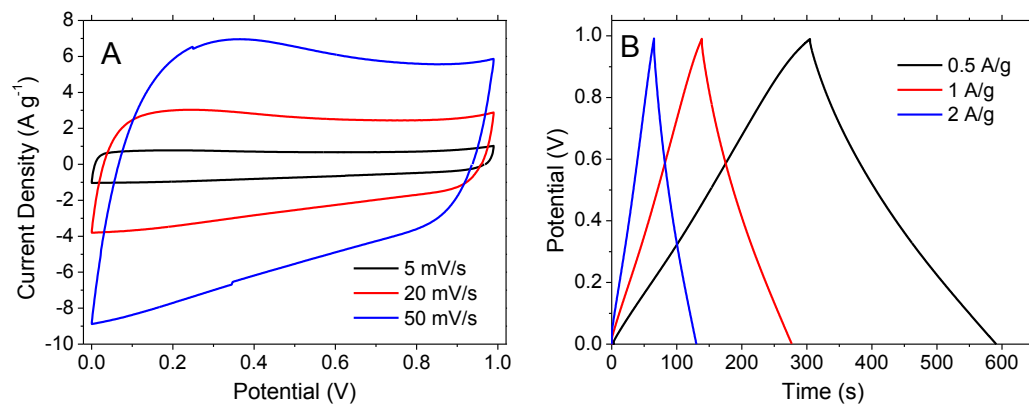

**Fig. S6** Electrochemical performance of PMC-650 for supercapacitor in a 2-electrode symmetric cell configuration in 1M H<sub>2</sub>SO<sub>4</sub>; cyclic voltammograms at 5, 20 and 50 mV/S (A); galvanostatic charge/discharge curves at 0.5, 1 and 2 A g<sup>-1</sup> (B). The current density is calculated according to the mass of active material on single electrode.
